# Supplementary material for: New technology must support, not restrict humaneness: a qualitative interview study on the potential influences of a new digital system on specialized outpatient palliative care
Source: Research Square preprint supplement (doi:10.21203/rs.3.rs-5834363/v1), 2025-05-05

# How is data currently recorded and passed on in everyday SAPV care?

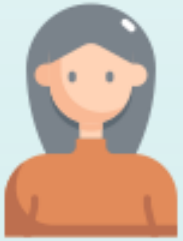

Example: typical patient

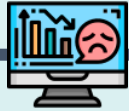

monitoring of symptom burden

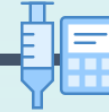

opioid prescription

Other scenarios

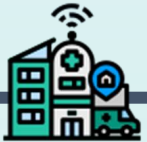

recognition of palliative care  
needs

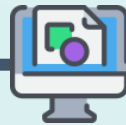

monitoring of health status

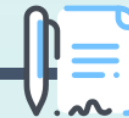

advance care planning

# Care Situation with the TEAM-X-system

## Imagine the system was installed tomorrow - what would change?

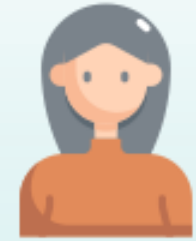

Mrs Meier  
68 years

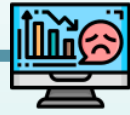

Digital monitoring of  
symptom burden

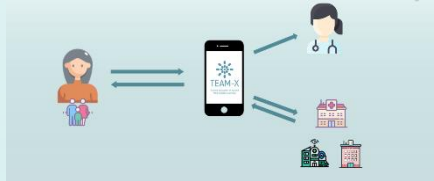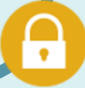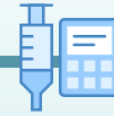

Digital opioid prescription  
and recording of (side)  
effects

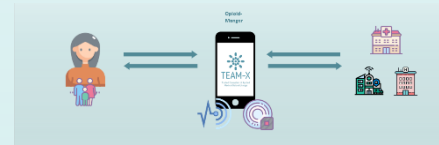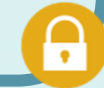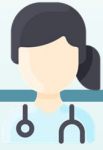

Simplified data exchange  
between practitioners

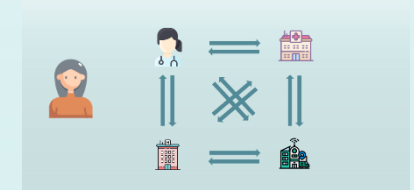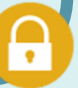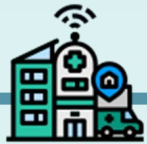

Digital recognition of  
palliative care needs

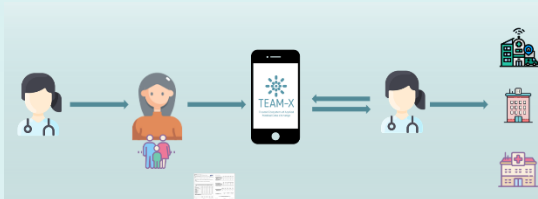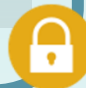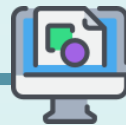

Digital monitoring of health  
status with the integration of  
biometric data

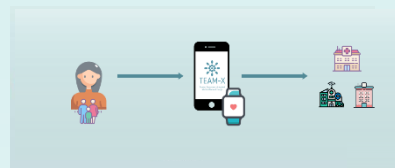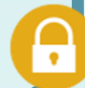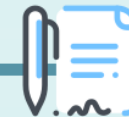

Digital information about  
advance care planning

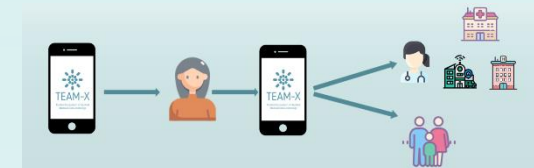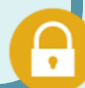

# General Functions of TEAM-X

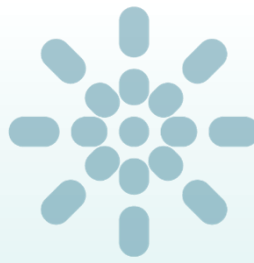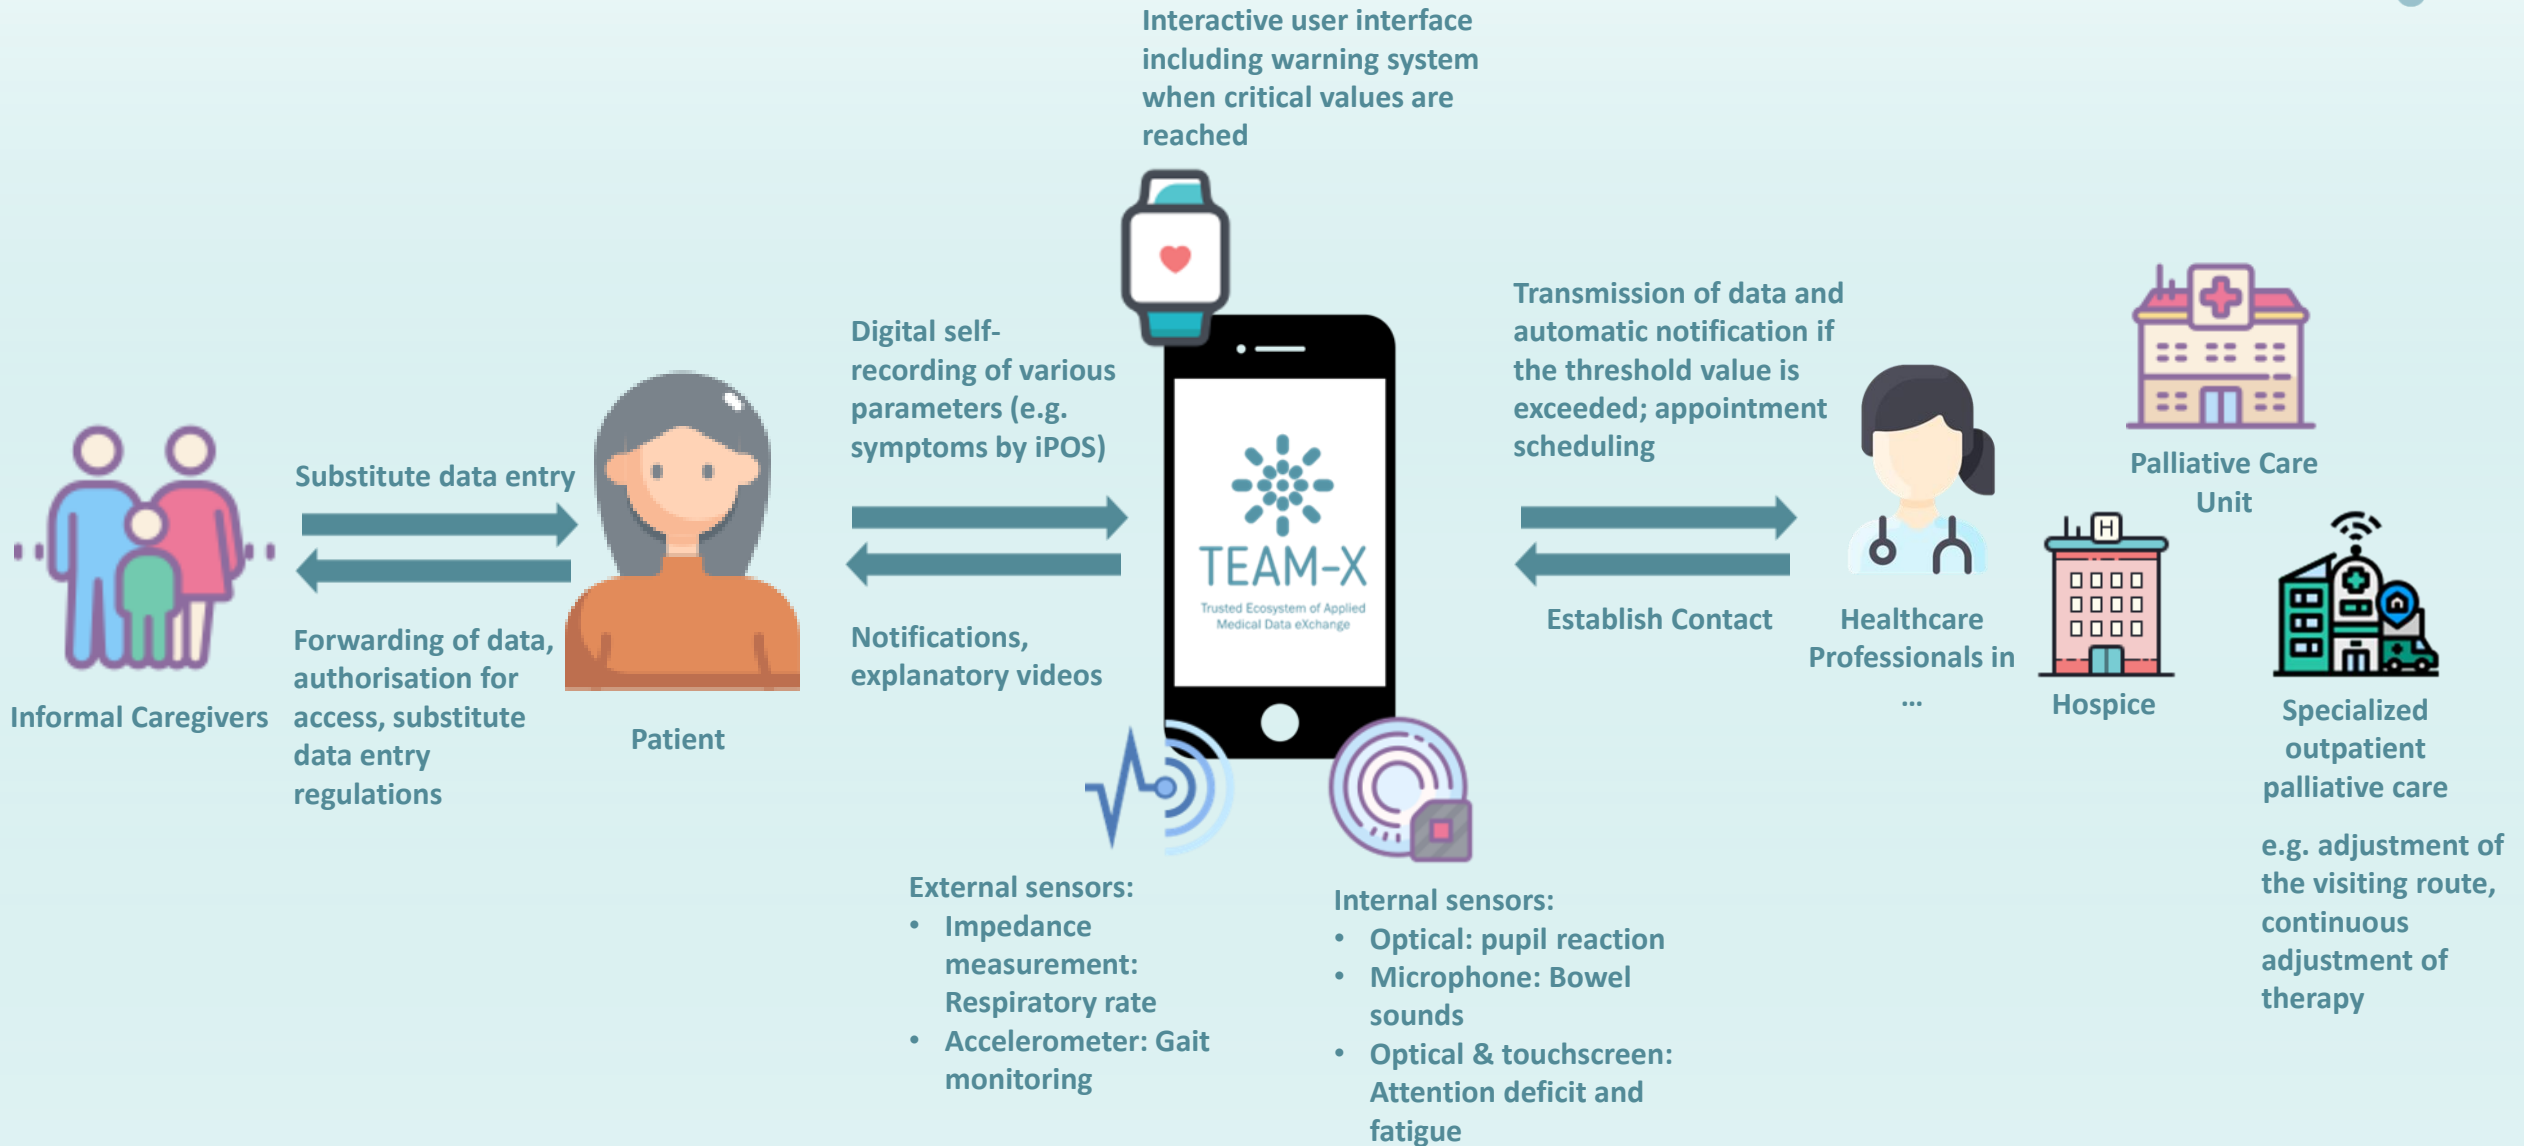

Supplement: Supplementary file [file ee5577757b396c5ecf02ae27.pdf]
