# Supplementary material for: New technology must support, not restrict humaneness: a qualitative interview study on the potential influences of a new digital system on specialized outpatient palliative care
Source: Research Square preprint supplement (doi:10.21203/rs.3.rs-5834363/v1), 2025-05-05
Supplement: Supplementary file [file c49bebf9837172d91904c82f.pdf]

## **Interview guideline**

### **Semi-structured interviews with healthcare professionals and relatives in specialized palliative outpatient care in the TEAM-X project**

- Welcome
  - Brief introduction of GAIA-X and TEAM-X
  - Introduction
1. **Narrative impulse: How is data currently recorded and passed on in everyday specialized palliative outpatient care?**
    - 1.1 **How are/ were the symptoms, well-being and changes in health status of palliative care patients currently recorded?**
  2. **Narrative Impulse: Imagine the system was installed tomorrow - what would change?**  
(preceded by a brief introduction to the possible applications of TEAM-X)
    - 2.1 **How would the implementation of the TEAM-X data ecosystem change your and your patient's everyday care?**
  3. **Narrative Impulse: What is your assessment of the system?**
    - ➔ Does the approach presented make sense from your point of view? Or what would it take for you to perceive it as useful?
    - ➔ Under what conditions would it make sense to you?
    - ➔ What would you wish for?
    - ➔ Under what conditions would you use/not use the system?
    - ➔ What are the limitations of monitoring symptoms and well-being and monitoring changes in general condition using the TEAM-X data ecosystem?
    - ➔ What concerns do you have?
  4. **Narrative Impulse: What do you think is needed to ensure that the TEAM-X data ecosystem can be used and integrated well into healthcare in the long term?**
    - ➔ What skills are needed? For patients, relatives and caregivers?
    - ➔ Do they need specific training?
    - ➔ Are there any requirements from an organizational perspective?
    - ➔ What must be taken into account when developing the system?
    - ➔ What expectations and requirements do you have of the design?
- Summary
  - Thanks and Farewell
